# Supplementary material
Source: PubMed Central journal article supplement (PMC4336536)
Supplement: jn.114.203133_nutrition203133SupplementaryData1.pdf [file jn.114.203133_nutrition203133SupplementaryData1.pdf]

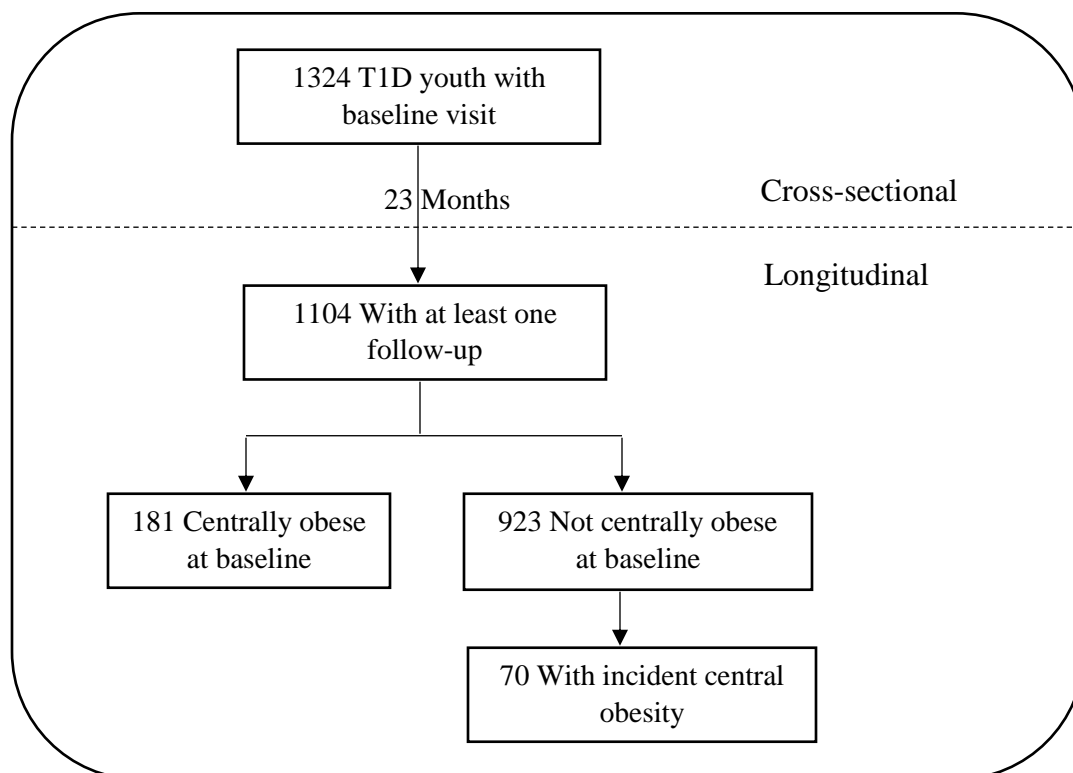

**Supplemental Figure 1.** Participant Selection and Follow-up flow

**Supplemental Table 1.** Baseline Characteristics of Participants with follow-up data who were not centrally obese at baseline according to incident central obesity<sup>1</sup>

|                                    | Non-central<br>obesity<br>(N=923) | New case of central<br>obesity<br>(N=70) | <i>P</i> |
|------------------------------------|-----------------------------------|------------------------------------------|----------|
| Age category, y                    |                                   |                                          | <0.0001  |
| 2-9                                | 221 (25.9)                        | 5 (7.1)                                  |          |
| 10-14                              | 362 (42.4)                        | 26 (37.1)                                |          |
| 15-                                | 270 (31.7)                        | 39 (55.7)                                |          |
| Sex                                |                                   |                                          | <0.0001  |
| Female                             | 391 (45.8)                        | 49 (70.00)                               |          |
| Male                               | 462 (54.2)                        | 21 (30.0)                                |          |
| Race                               |                                   |                                          | 0.39     |
| Non-Hispanic Black                 | 60 (7.0)                          | 8 (11.4)                                 |          |
| Non-Hispanic White                 | 698 (81.8)                        | 54 (77.1)                                |          |
| Other                              | 95 (11.1)                         | 8 (11.4)                                 |          |
| Parental education                 |                                   |                                          | 0.35     |
| High school or less                | 149 (17.5)                        | 17 (24.3)                                |          |
| Some college/Associate's<br>degree | 277 (32.6)                        | 22 (31.4)                                |          |
| Bachelor's degree or more          | 425 (49.9)                        | 31 (44.3)                                |          |
| Income, K\$                        |                                   |                                          | 0.026    |
| DK/Ref <sup>2</sup>                | 56 (6.6)                          | 0 (0)                                    |          |
| <25                                | 89 (10.5)                         | 12 (17.1)                                |          |
| 25-49                              | 176 (20.7)                        | 20 (28.6)                                |          |
| 50-74                              | 175 (20.6)                        | 9 (12.9)                                 |          |
| >75                                | 354 (41.7)                        | 29 (41.4)                                |          |
| Insulin regimen                    |                                   |                                          | 0.65     |
| Basal-bolus                        | 652 (77.3)                        | 55 (79.7)                                |          |
| The others                         | 191 (22.7)                        | 14 (20.3)                                |          |

<sup>1</sup> Values are n (%).<sup>2</sup> DK/Ref: Don't know/Refused.

**Supplemental Table 2.** Odds Ratios (OR) (95% CI) of Incident Central Obesity of Every SD Unit of Baseline Biomarkers using Logistic Regression Analysis<sup>1</sup>

| Exposure variables | Baseline Non-central Obese |                      |                     |
|--------------------|----------------------------|----------------------|---------------------|
|                    | Model 1 <sup>2</sup>       | Model 2 <sup>3</sup> | Model3 <sup>4</sup> |
|                    | OR (95% CI)                | OR (95% CI)          | OR (95% CI)         |
| PA(16:0)           | 1.01 (0.85, 1.20)          | 1.12 (0.91, 1.38)    | 1.11 (0.86, 1.44)   |
| SA(18:0)           | 1.02 (0.87, 1.21)          | 0.87 (0.69, 1.10)    | 0.68 (0.50, 0.93)   |
| POA(16:1)          | 0.99 (0.82, 1.20)          | 1.06 (0.84, 1.36)    | 1.17 (0.79, 1.75)   |
| OA(18:1)           | 0.89 (0.73, 1.07)          | 0.88 (0.69, 1.13)    | 0.89 (0.66, 1.20)   |
| LA(18:2)           | 1.00 (0.85, 1.19)          | 1.01 (0.81, 1.26)    | 1.22 (0.90, 1.65)   |
| DGLA(20:3)         | 1.03 (0.88, 1.20)          | 1.03 (0.83, 1.27)    | 1.09 (0.84, 1.41)   |
| AA(20:4)           | 1.02 (0.87, 1.19)          | 0.99 (0.81, 1.20)    | 0.88 (0.67, 1.14)   |
| ALA(18:3)          | 1.11 (0.94, 1.32)          | 1.00 (0.79, 1.27)    | 0.97 (0.75, 1.26)   |
| EPA(20:5)          | 1.05 (0.90, 1.22)          | 1.10 (0.90, 1.36)    | 1.11 (0.85, 1.45)   |
| DHA(22:6)          | 0.96 (0.80, 1.15)          | 0.96 (0.74, 1.23)    | 0.82 (0.56, 1.20)   |
| n-6/n-3            | 0.95 (0.80, 1.13)          | 0.92 (0.72, 1.18)    | 1.07 (0.76, 1.50)   |
| D5D                | 1.00 (0.86, 1.17)          | 1.02 (0.83, 1.24)    | 0.95 (0.72, 1.25)   |
| D6D                | 1.02 (0.86, 1.21)          | 1.02 (0.82, 1.28)    | 1.02 (0.77, 1.34)   |
| D9D-16             | 0.99 (0.81, 1.20)          | 1.04 (0.80, 1.36)    | 1.12 (0.72, 1.75)   |
| D9D-18             | 0.92 (0.78, 1.09)          | 0.97 (0.78, 1.21)    | 1.08 (0.82, 1.42)   |
| Vitamin D          | 0.81 (0.68, 0.96)          | 0.84 (0.69, 1.03)    | 0.82 (0.65, 1.04)   |
| Vitamin E          | 1.10 (0.95, 1.27)          | 1.08 (0.90, 1.31)    | 1.13 (0.91, 1.40)   |

<sup>1</sup> Values are ORs (95% CI).

<sup>2</sup> Model 1 adjusted for baseline waist and time between the baseline and the follow-up examinations diabetes duration.

<sup>3</sup> Model 2 further adjusted for age group at follow-up, sex, race/ethnicity, season (only for vitamin D), parental education at baseline, clinic site at baseline, insulin regimen, insulin dose and HbA1c at follow-up base on model 1.

<sup>4</sup> Model 3 further adjusted for BMI group at follow-up base on model 2.
